# Supplementary material
Source: MDPI journal article supplement (https://www.mdpi.com/2072-4292/14/22/5901)
Supplement: s1 [file s1]

# Repeated (4D) marine geophysical survey as a tool for studying the coastal environment and groundthruting remote sensing observations and modelling

Giuseppe Stanghellini, Camilla Bidini, Claudia Romagnoli, Renata Archetti, Massimo Ponti, Eva Turicchia, Fabrizio Del Bianco, Alessandra Mercorella, Alina Polonia, Giulia Giorgetti, Andrea Gallerani, and Luca Gasperini

## Supplementary Materials

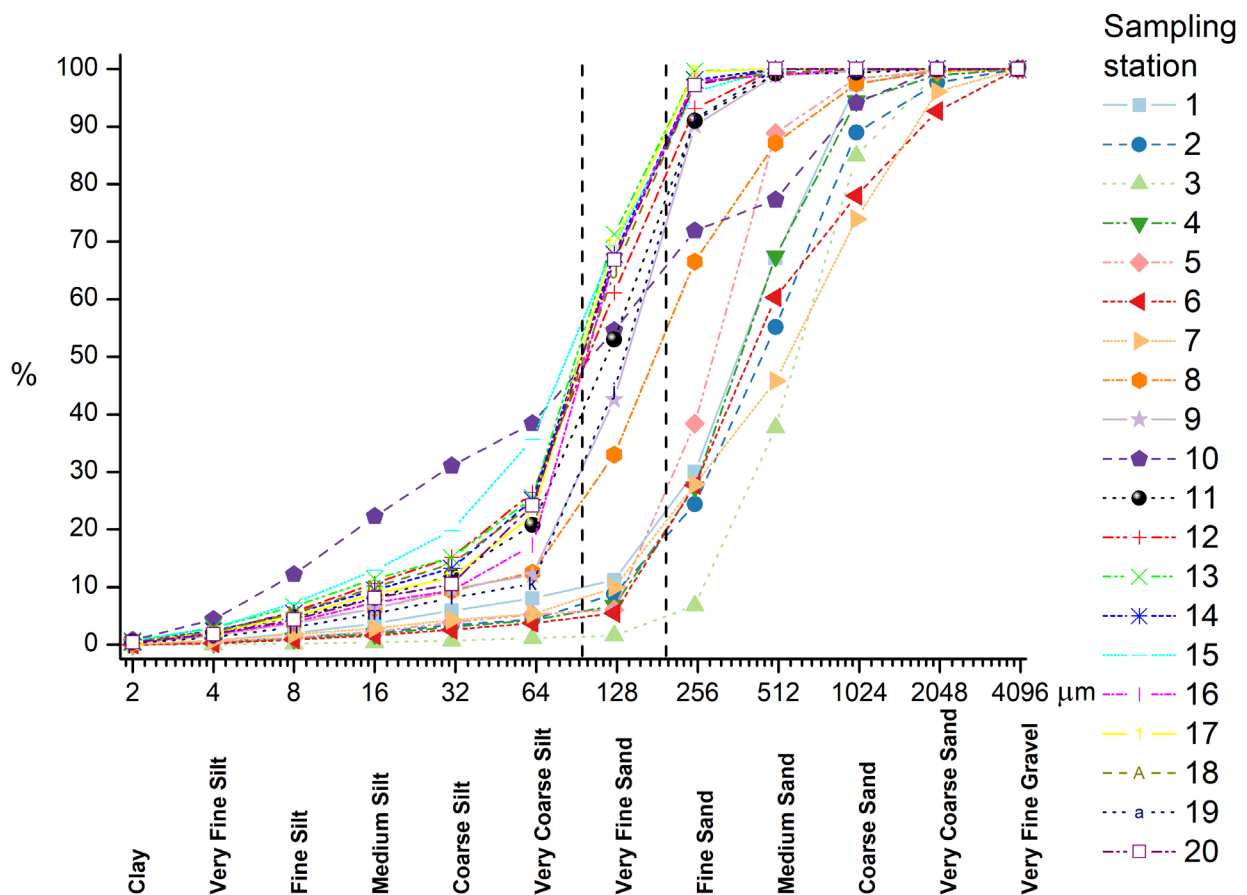

**Figure S1.** Particle size distribution curve on log<sub>2</sub> scale at each sampling station.

**Table S1.** Geographic coordinates, depth, reflectivity and grain size percentage at each sampling station.

| Sampling station | Geographic                |         |            |              | Grain size classes |                |           |             |             |                  |                |           |             |             |                  |                  |             |               |               |                    |  |
|------------------|---------------------------|---------|------------|--------------|--------------------|----------------|-----------|-------------|-------------|------------------|----------------|-----------|-------------|-------------|------------------|------------------|-------------|---------------|---------------|--------------------|--|
|                  | coordinate<br>UTM33 WGS84 |         | Depth<br>m | Reflectivity | Clay               | Very Fine Silt | Fine Silt | Medium Silt | Coarse Silt | Very Coarse Silt | Very Fine Sand | Fine Sand | Medium Sand | Coarse Sand | Very Coarse Sand | Very Fine Gravel | Fine Gravel | Medium Gravel | Coarse Gravel | Very Coarse Gravel |  |
|                  |                           |         |            |              |                    |                |           |             |             |                  |                |           |             |             |                  |                  |             |               |               |                    |  |
|                  | X                         | Y       | < 2 μm     | < 4 μm       | < 8 μm             | < 16 μm        | < 31 μm   | < 62 μm     | < 125 μm    | < 250 μm         | < 500 μm       | < 1000 μm | < 2000 μm   | < 4000 μm   | < 8000 μm        | < 1600 μm        | < 3200 μm   | < 6400 μm     |               |                    |  |
| 1                | 286606                    | 4917462 | -1.38      | 0.4369       | 0.07%              | 0.63%          | 1.31%     | 1.66%       | 2.24%       | 2.14%            | 3.13%          | 18.82%    | 37.16%      | 30.18%      | 2.67%            | 0.00%            | 0.00%       | 0.00%         | 0.00%         | 0.00%              |  |
| 2                | 286622                    | 4917581 | -1.88      | 0.4410       | 0.00%              | 0.42%          | 0.84%     | 0.87%       | 1.28%       | 0.93%            | 4.41%          | 15.66%    | 30.77%      | 33.76%      | 8.66%            | 2.40%            | 0.00%       | 0.00%         | 0.00%         | 0.00%              |  |
| 3                | 286569                    | 4917668 | -1.15      | 0.5041       | 0.00%              | 0.00%          | 0.17%     | 0.24%       | 0.23%       | 0.50%            | 0.42%          | 5.24%     | 30.93%      | 47.19%      | 14.48%           | 0.60%            | 0.00%       | 0.00%         | 0.00%         | 0.00%              |  |
| 4                | 286602                    | 4917742 | -1.92      | 0.4073       | 0.00%              | 0.31%          | 0.76%     | 0.79%       | 1.17%       | 1.22%            | 2.51%          | 20.64%    | 40.10%      | 26.92%      | 4.47%            | 1.11%            | 0.00%       | 0.00%         | 0.00%         | 0.00%              |  |
| 5                | 286568                    | 4917792 | -0.88      | 0.5306       | 0.01%              | 0.40%          | 0.85%     | 0.97%       | 1.63%       | 1.37%            | 0.86%          | 32.29%    | 50.52%      | 9.52%       | 1.20%            | 0.39%            | 0.00%       | 0.00%         | 0.00%         | 0.00%              |  |
| 6                | 286603                    | 4917876 | -0.82      | 0.5382       | 0.00%              | 0.20%          | 0.69%     | 0.71%       | 0.98%       | 1.16%            | 1.70%          | 22.27%    | 32.63%      | 17.66%      | 14.69%           | 7.32%            | 0.00%       | 0.00%         | 0.00%         | 0.00%              |  |
| 7                | 286668                    | 4917810 | -3.24      | 0.2652       | 0.07%              | 0.65%          | 1.07%     | 1.04%       | 1.45%       | 1.02%            | 4.60%          | 17.91%    | 17.98%      | 28.14%      | 22.13%           | 3.94%            | 0.00%       | 0.00%         | 0.00%         | 0.00%              |  |
| 8                | 286734                    | 4917740 | -3.91      | 0.2790       | 0.27%              | 1.30%          | 2.16%     | 2.56%       | 3.04%       | 3.20%            | 20.48%         | 33.51%    | 20.61%      | 10.34%      | 2.14%            | 0.38%            | 0.00%       | 0.00%         | 0.00%         | 0.00%              |  |
| 9                | 286683                    | 4917656 | -2.59      | 0.3303       | 0.31%              | 1.36%          | 2.05%     | 2.52%       | 3.37%       | 2.49%            | 30.43%         | 47.63%    | 8.72%       | 0.74%       | 0.38%            | 0.00%            | 0.00%       | 0.00%         | 0.00%         | 0.00%              |  |
| 10               | 286756                    | 4917595 | -4.17      | 0.2672       | 0.78%              | 3.59%          | 7.84%     | 10.11%      | 8.77%       | 7.37%            | 16.14%         | 17.34%    | 5.34%       | 16.85%      | 5.89%            | 0.00%            | 0.00%       | 0.00%         | 0.00%         | 0.00%              |  |
| 11               | 286705                    | 4917506 | -3.17      | 0.2911       | 0.41%              | 1.61%          | 2.76%     | 3.31%       | 3.90%       | 8.77%            | 32.27%         | 38.00%    | 8.17%       | 0.21%       | 0.56%            | 0.05%            | 0.00%       | 0.00%         | 0.00%         | 0.00%              |  |
| 12               | 286825                    | 4917512 | -4.40      | 0.1939       | 0.47%              | 1.77%          | 3.46%     | 4.91%       | 4.59%       | 11.26%           | 34.65%         | 32.05%    | 6.84%       | 0.00%       | 0.00%            | 0.00%            | 0.00%       | 0.00%         | 0.00%         | 0.00%              |  |
| 13               | 286957                    | 4917525 | -4.77      | 0.1981       | 0.65%              | 2.30%          | 3.66%     | 4.80%       | 3.73%       | 10.40%           | 45.72%         | 28.40%    | 0.34%       | 0.00%       | 0.00%            | 0.00%            | 0.00%       | 0.00%         | 0.00%         | 0.00%              |  |
| 14               | 286882                    | 4917625 | -4.61      | 0.2066       | 0.49%              | 1.90%          | 3.04%     | 4.05%       | 3.80%       | 11.85%           | 42.69%         | 30.27%    | 1.90%       | 0.00%       | 0.00%            | 0.00%            | 0.00%       | 0.00%         | 0.00%         | 0.00%              |  |
| 15               | 286805                    | 4917696 | -4.18      | 0.1710       | 0.64%              | 2.24%          | 4.34%     | 5.72%       | 6.91%       | 15.81%           | 33.66%         | 26.76%    | 3.92%       | 0.00%       | 0.00%            | 0.00%            | 0.00%       | 0.00%         | 0.00%         | 0.00%              |  |
| 16               | 286944                    | 4917739 | -4.92      | 0.2038       | 0.39%              | 1.42%          | 2.13%     | 3.39%       | 2.07%       | 7.89%            | 49.69%         | 30.97%    | 0.98%       | 1.05%       | 0.04%            | 0.00%            | 0.00%       | 0.00%         | 0.00%         | 0.00%              |  |
| 17               | 286876                    | 4917811 | -4.68      | 0.1899       | 0.46%              | 1.69%          | 2.77%     | 3.99%       | 2.76%       | 10.83%           | 47.21%         | 29.80%    | 0.51%       | 0.00%       | 0.00%            | 0.00%            | 0.00%       | 0.00%         | 0.00%         | 0.00%              |  |
| 18               | 286793                    | 4917845 | -4.11      | 0.1801       | 0.46%              | 1.72%          | 3.27%     | 4.51%       | 4.06%       | 10.36%           | 40.40%         | 32.56%    | 2.08%       | 0.49%       | 0.09%            | 0.00%            | 0.00%       | 0.00%         | 0.00%         | 0.00%              |  |
| 19               | 286775                    | 4917912 | -3.72      | 0.2320       | 0.21%              | 1.09%          | 1.71%     | 2.37%       | 2.72%       | 2.49%            | 33.73%         | 47.01%    | 8.66%       | 0.01%       | 0.00%            | 0.00%            | 0.00%       | 0.00%         | 0.00%         | 0.00%              |  |
| 20               | 286925                    | 4917936 | -5.02      | 0.1858       | 0.41%              | 1.38%          | 2.54%     | 3.78%       | 2.39%       | 13.70%           | 42.67%         | 30.35%    | 2.80%       | 0.00%       | 0.00%            | 0.00%            | 0.00%       | 0.00%         | 0.00%         | 0.00%              |  |
